# Supplementary material for: Chemical-PDMS binding kinetics and implications for bioavailability in microfluidic devices
Source: Royal Society of Chemistry journal article supplement (doi:10.1039/c8lc00796a), 2019-01-01
Supplement: c8lc00796a1.pdf [file c8lc00796a1.pdf]

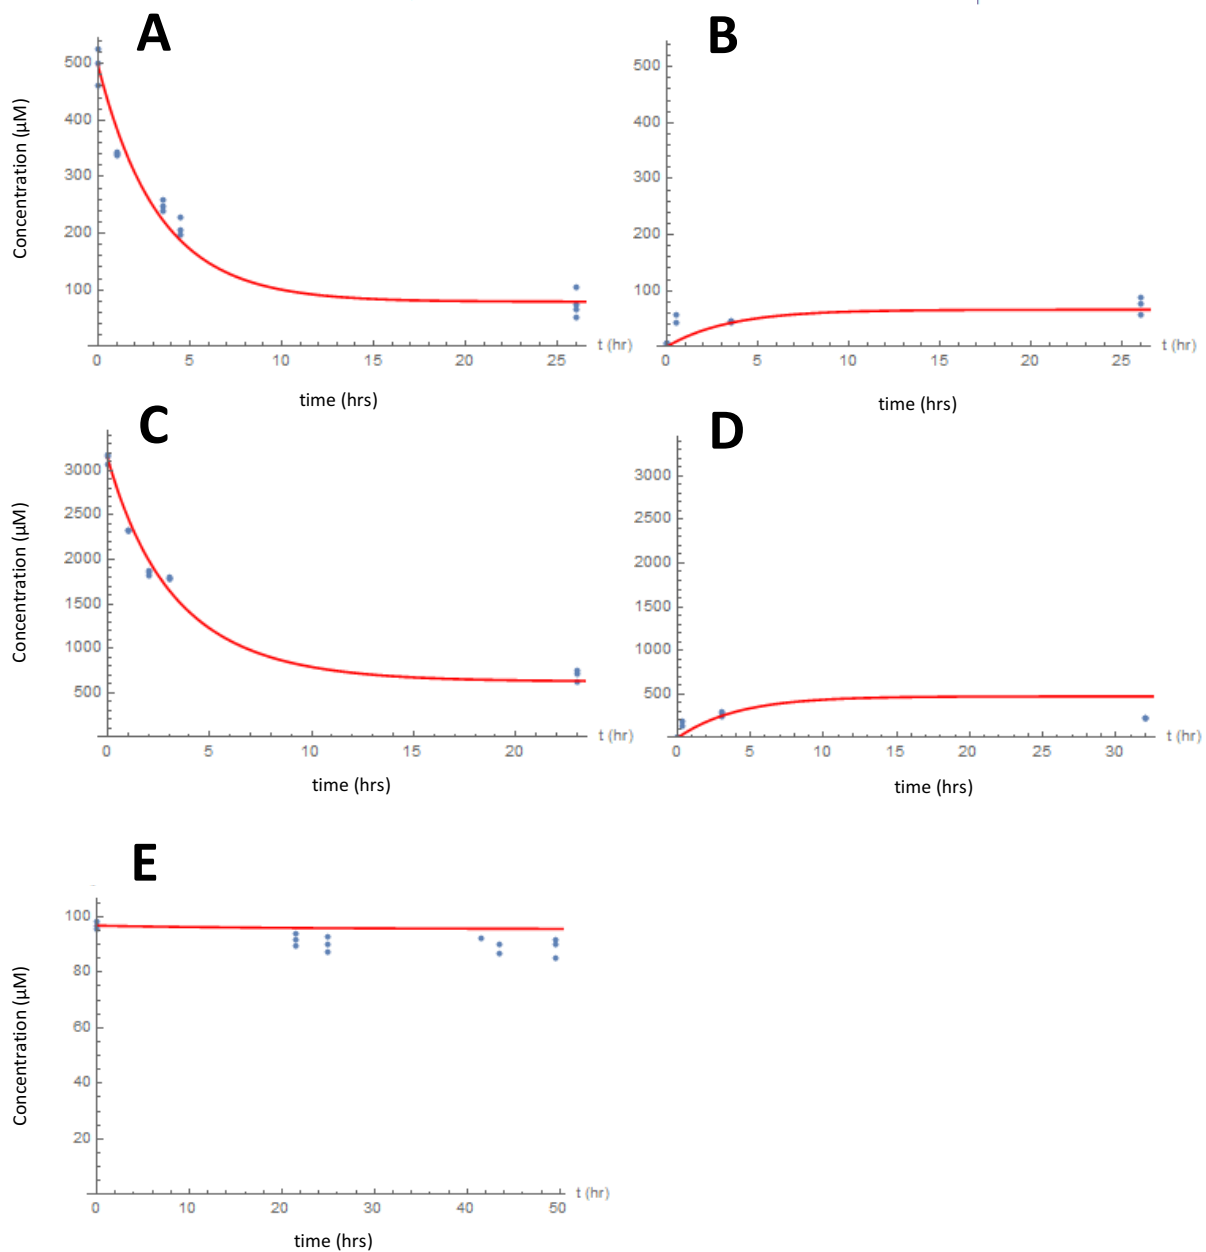

Fig. S1: Simultaneous fit of microscopic model for binding kinetics (eqn(3)) to all bisphenol A experiments. (A,B) Adsorption and desorption, respectively, for 488  $\mu\text{M}$  channel experiment, (C,D) adsorption and desorption for 3000  $\mu\text{M}$  channel experiment and (E) adsorption for disk experiment.
